# Supplementary material for: SRSF9 promotes colorectal cancer progression via stabilizing DSN1 mRNA in an m6A-related manner
Source: J Transl Med. 2022 May 4;20:198. doi: 10.1186/s12967-022-03399-3 (PMC9066907; doi:10.1186/s12967-022-03399-3)
Supplement: Supplementary file 4 — Additional file 4: Table S4. The differentially expressed genes (DEGs) between 473 human CRC tissue sample data sets and 41 normal tissue sample data sets in The Cancer Genome Atlas (TCGA) database. [file 12967_2022_3399_MOESM4_ESM.xls]

## Sheet: Sheet1
Table S4: The differentially expressed genes (DEGs) between 473 human CRC tissue sample data sets and 41 normal tissue sample data sets in The Cancer Genome Atlas (TCGA) database
gene	logFC	logCPM	P Value	FDR
SLC17A8	-5.26544	1.71623	2.54e-97	5.3e-95
ZZEF1	-1.78295	9.64065	1.16e-95	2.27e-93
C1orf115	-2.47694	8.61581	5.85e-95	1.09e-92
TEF	-1.89766	7.69368	4.95e-94	8.71e-92
CITED2	-1.78067	8.32181	8.23e-93	1.38e-90
FAM129A	-3.05925	7.8799	8.47e-92	1.35e-89
CNNM4	-1.73974	9.86831	1.73e-88	2.63e-86
GUCA2A	-5.36998	9.35733	5.1e-08	1.43e-85
TMEM220-AS1	-2.73859	3.02859	2.36e-86	3.42e-84
CLDN1	4.79567	9.91596	5.6e-85	7.8e-83
GPAT3	-2.54782	6.75896	6.73e-85	8.99e-83
CPO	-6.35364	3.27398	8.9e-08	3.6e-81
TESK2	-1.45163	6.35578	3.08e-83	3.95e-81
DPT	-3.83439	7.50916	3.59e-83	4.45e-81
SLC22A18AS	-2.42176	6.61769	1.25e-82	1.49e-80
CD163L1	-3.03437	6.52874	1.04e-07	4.41e-80
USP2	-4.09505	5.88336	5.5e-08	7.36e-80
SPIB	-4.15537	6.39495	2.03e-81	2.34e-79
SCN7A	-4.81991	5.1858	2.12e-80	2.36e-78
TMCC3	-2.48646	8.32243	4.4e-07	4.5e-78
CCNYL1	-1.40394	8.0121	3.47e-78	3.74e-76
TAT	-3.84164	2.12051	7.24e-08	5.4e-76
LINC01645	-4.40949	1.16638	1.96e-07	5.41e-76
INSL5	-6.57321	5.10753	5.29e-78	5.52e-76
TM6SF2	-3.32572	4.00347	7.09e-78	7.18e-76
NFE2L3	2.60675	10.3801	8.49e-78	8.35e-76
GSTA2	-5.23889	2.21842	4.8e-07	4.87e-75
CEMIP	5.21248	10.5056	5.2e-77	4.97e-75
CDH3	5.92974	9.92593	8.59e-08	1.36e-74
TMEM72	-4.4888	5.00718	8.58e-08	3.44e-72
STMN4	-4.22982	1.27964	1.8e-73	1.67e-71
SLC25A34	-4.11086	4.79576	5.64e-08	3.47e-71
STMN2	-3.55054	5.46552	1.26e-72	1.14e-70
PRPH	-3.72783	3.71309	1.9e-72	1.67e-70
KRTAP13-2	-5.92824	1.60323	4.45e-72	3.81e-70
SST	-5.05865	4.29423	1.13e-71	9.46e-70
FBLIM1	-1.37733	9.92406	7.13e-70	5.81e-68
TRIP13	2.27964	8.12401	2.1e-69	1.67e-67
OPN3	-1.79255	6.34018	2.6e-68	2.02e-66
LITAF	-1.29185	10.7311	3.09e-67	2.34e-65
RNF150	-3.17424	5.72834	1.39e-66	1.03e-64
SMYD1	-4.6054	3.48744	1.77e-65	1.28e-63
SLCO4A1	3.44436	9.55583	2.88e-64	2.05e-62
MOBP	-2.99106	1.19378	1.33e-63	9.26e-62
KANK2	-1.88716	9.41718	3.38e-63	2.3e-61
PAPSS2	-2.0423	10.1147	1.06e-62	7.1e-61
SLC13A1	-5.78975	1.85233	1.66e-62	1.09e-60
GPM6B	-2.53483	5.56465	2.05e-62	1.32e-60
AC082651.2	-4.62589	-0.333125	4.21e-62	2.66e-60
RIOK3	-1.54805	9.72198	5.08e-62	3.15e-60
ADCY9	-1.5239	8.16337	7.81e-62	4.74e-60
CAP2	-2.26873	5.82987	1.46e-61	8.71e-60
CLEC9A	-2.82906	1.69394	2.28e-61	1.33e-59
LILRB5	-2.68002	5.48687	2.36e-61	1.36e-59
CHAT	-4.50167	0.483864	3.03e-59	1.71e-57
ANGPTL1	-3.8878	5.35599	1.69e-58	9.38e-57
KIAA1257	3.48009	5.59443	7.92e-58	4.34e-56
DDN	4.59081	5.09479	2.22e-57	1.19e-55
ZG16	-4.7416	10.7019	3.3e-57	1.75e-55
CNTN2	-3.7499	2.66078	1.18e-56	6.15e-55
FRMPD4	-4.34695	1.3944	1.25e-56	6.41e-55
EPB41L3	-2.64635	7.91196	1.61e-56	8.16e-55
TMOD1	-2.83665	4.5921	2.27e-56	1.13e-54
ADGRB3	-3.4682	2.3364	2.65e-56	1.3e-54
HAPLN1	-2.45175	5.04863	5.7e-56	2.76e-54
EIF4E3	-1.84307	8.05667	6.06e-56	2.89e-54
CPT1A	-1.31734	10.6435	3.37e-54	1.59e-52
TSPAN1	-2.32805	12.1033	4.39e-54	2.04e-52
IGKV2-30	-3.84956	4.1235	1.71e-53	7.85e-52
PHOX2A	-3.57941	0.932278	2.78e-53	1.25e-51
CYP2B7P	-3.00312	3.49888	1.32e-52	5.89e-51
AUNIP	2.17654	5.81997	6.23e-52	2.74e-50
DAAM2	-1.95895	6.59711	1.29e-51	5.58e-50
CYP2D6	-2.53496	4.70547	1.71e-51	7.33e-50
JOSD1	-1.015	9.79803	4.41e-51	1.86e-49
GNG3	-2.24984	2.09196	9.81e-51	4.1e-49
LPCAT3	-1.33479	7.85676	2.02e-50	8.33e-49
TEAD4	2.24546	8.21516	2.1e-50	8.55e-49
KAT2B	-1.69823	7.13299	5.97e-50	2.4e-48
AC103563.1	-3.96191	1.29191	6.74e-50	2.68e-48
CPEB3	-1.3864	5.84538	9.13e-50	3.59e-48
MIR1-1HG-AS1	-3.37468	2.44306	9.28e-48	3.56e-46
NPY	-3.58994	1.22919	1.08e-47	4.08e-46
ANLN	2.09857	9.20048	1.15e-46	4.33e-45
BMP2	-1.93168	7.71976	1.87e-46	6.93e-45
PI16	-3.92219	5.27544	5.46e-46	2.01e-44
CD160	-2.30809	2.88047	5.62e-46	2.04e-44
APOBEC3A	-2.75727	3.63461	8.42e-46	3.03e-44
RIPK2	1.56229	8.14975	1.33e-45	4.74e-44
MMRN1	-3.08744	5.78947	1.72e-45	6.04e-44
AKR1B10	-3.10225	8.17721	2.63e-45	9.17e-44
CGN	-1.49818	10.4035	4.21e-45	1.45e-43
AL138995.1	-2.15905	0.973439	5.23e-45	1.78e-43
BMX	-2.37021	4.43856	1.58e-44	5.33e-43
AP000944.1	-2.57385	0.0631638	3.03e-44	1.01e-42
TENT5C	-1.97878	8.33545	4.78e-44	1.58e-42
AC022034.1	-2.53274	3.32009	1.77e-43	5.81e-42
MASP1	-3.2857	5.90143	3.57e-43	1.16e-41
TOM1L2	-1.22213	9.05266	5.12e-43	1.65e-41
CHODL	-2.87437	2.88868	6.07e-43	1.93e-41
LRRC66	-1.94272	6.40939	1.53e-42	4.81e-41
NAALADL1	-3.52319	6.37825	7.24e-08	5.19e-41
RBM20	-2.64427	2.94219	1.85e-42	5.77e-41
PPARGC1B	-1.34386	7.72026	1.94e-42	6e-41
ZSWIM6	-1.07009	7.64058	2.16e-42	6.61e-41
CAPN5	-1.4952	10.8391	2.4e-42	7.29e-41
FLNA	-2.14316	13.1924	3.33e-42	1e-40
CNTFR	-3.75027	5.0976	4.74e-42	1.41e-40
CTSG	-3.29446	4.02322	6.73e-42	1.99e-40
ATP6V0D2	-2.25731	4.02781	8.11e-42	2.38e-40
SMOX	2.29489	7.97461	2.01e-41	5.85e-40
CCNO	2.96068	6.72405	3.03e-41	8.73e-40
B3GNTL1	1.4953	6.28471	4.92e-41	1.41e-39
CBFB	1.32475	9.36703	5.11e-41	1.45e-39
KLK6	9.52528	8.22202	6.14e-41	1.72e-39
SOX4	1.66018	10.6613	7.22e-41	2.01e-39
IGHV3-7	-3.92416	4.12555	8.9e-41	2.46e-39
CES3	-2.23648	9.05974	9.64e-41	2.64e-39
AC005180.1	-3.17919	0.849933	3.42e-40	9.29e-39
TCF7L1	-1.54115	6.01375	1.02e-39	2.75e-38
ADAMTS12	3.44096	7.83435	1.06e-39	2.85e-38
ARRB1	-1.17048	8.60855	1.13e-39	2.99e-38
PDZK1	-2.53109	4.05811	1.23e-39	3.24e-38
TCN2	-1.70661	8.11391	1.38e-39	3.61e-38
MMP11	4.33582	10.2267	1.54e-39	3.99e-38
MAPK15	4.31011	6.06228	2.69e-39	6.91e-38
GNA13	-1.07165	9.55089	3.48e-39	8.88e-38
FAM89A	1.72409	6.85968	3.98e-39	1.01e-37
SMKR1	4.04699	4.23889	1.37e-38	3.44e-37
FAM222A-AS1	3.49356	3.42088	1.9e-38	4.74e-37
MAF	-1.76796	7.87698	2.21e-38	5.48e-37
CAPN2	-1.20903	11.3624	2.5e-38	6.13e-37
AL121949.2	-3.86437	0.289712	5.65e-38	1.38e-36
SHE	-1.80222	5.30656	7.45e-38	1.79e-36
AL356489.2	-3.15333	1.56119	7.46e-38	1.79e-36
ACAN	3.07088	6.58544	1.15e-37	2.75e-36
PERM1	3.00184	4.00661	4.01e-37	9.51e-36
C5orf34	1.56862	5.4182	4.73e-37	1.11e-35
PTK2B	-1.27598	9.27037	1.17e-36	2.73e-35
IGKV1OR2-108	-2.98607	4.47547	1.31e-36	3.05e-35
GALR1	-3.47307	0.703568	1.35e-36	3.1e-35
GRHL3	3.71907	5.67751	1.43e-36	3.28e-35
LGALS2	-2.614	6.72459	1.63e-36	3.69e-35
CASD1	-1.29686	7.79846	1.66e-36	3.76e-35
WDR62	1.8463	7.4214	2.28e-36	5.11e-35
RXRG	-3.1887	2.16701	3.36e-36	7.36e-35
SMIM28	-3.64569	0.380298	3.37e-36	7.36e-35
CCDC13	-1.75651	2.28896	3.37e-36	7.36e-35
CD101	-1.44038	4.62666	4.14e-36	8.97e-35
UTP4	1.12524	9.31603	1.02e-35	2.2e-34
FXYD5	2.0586	10.2181	1.18e-35	2.52e-34
NIPAL1	-1.37691	8.24981	1.93e-35	4.11e-34
SAPCD2	1.99425	9.5453	2.49e-35	5.27e-34
PALLD	-1.55358	10.4552	4.54e-35	9.53e-34
IGHV3-72	-3.07946	6.58285	5.67e-35	1.18e-33
MRGPRF-AS1	-2.55255	0.341592	6.04e-35	1.25e-33
CHRDL1	-3.05687	7.0442	7.64e-35	1.58e-33
MYC	1.87979	11.4818	7.95e-35	1.63e-33
DLGAP1-AS2	2.19951	6.68237	9.55e-35	1.95e-33
LINC00955	-3.52676	1.39428	1.88e-34	3.79e-33
IGHV3OR16-9	-3.07599	2.0301	2.52e-34	5.03e-33
STRIP2	2.46947	6.31732	2.67e-34	5.31e-33
ENTPD5	-2.62472	9.65046	9.23e-08	6.25e-33
PTGR1	-1.2238	8.42847	3.23e-34	6.39e-33
CCNF	1.44112	8.45657	3.66e-34	7.2e-33
KY	-2.45857	1.52309	5.73e-34	1.12e-32
COL21A1	-2.15304	3.75606	9.43e-34	1.83e-32
CMBL	-1.77875	9.85959	1.24e-33	2.38e-32
SVIL2P	-1.708	2.73196	1.7e-33	3.25e-32
OSTN-AS1	-2.81502	0.0415888	1.71e-33	3.25e-32
ADAMTS9-AS2	-2.6089	2.12603	2.73e-33	5.15e-32
CENPI	1.60302	6.47284	3.09e-33	5.79e-32
DENND1C	-1.1214	8.2901	4.68e-33	8.73e-32
AC107959.1	-1.64669	2.0019	5.12e-33	9.5e-32
WDR66	2.74886	5.05091	7.03e-33	1.3e-31
VDR	-1.16798	10.1171	9.12e-33	1.67e-31
LINC01977	3.68712	2.859	1.01e-32	1.83e-31
RELN	-2.59582	4.43574	1.2e-32	2.18e-31
PROKR1	-2.73337	0.276428	1.39e-32	2.51e-31
ZFYVE28	-1.32062	7.11211	1.47e-32	2.64e-31
TRHDE	-2.39262	4.68403	1.61e-32	2.88e-31
PRDM12	2.77969	1.88072	1.94e-32	3.44e-31
C19orf48	1.87787	10.2207	2.03e-32	3.59e-31
SLC8A2	-2.82225	3.68413	3.87e-32	6.81e-31
APOBR	-1.85959	9.21329	4.44e-32	7.76e-31
NRSN1	-3.17896	0.820128	9.63e-32	1.67e-30
BEX4	-1.89473	6.51499	1.22e-31	2.11e-30
SGCA	-2.4731	4.42127	1.73e-31	2.98e-30
MELK	1.42839	8.30597	2.03e-31	3.48e-30
RNFT2	1.97215	5.48798	3.38e-31	5.76e-30
BDKRB2	-1.30989	7.72117	6.37e-31	1.08e-29
CNTN3	-2.65843	4.34469	6.88e-31	1.16e-29
BRCA2	2.02941	7.46683	9.99e-31	1.67e-29
IGLV2-8	-2.82936	7.43223	1.2e-30	2e-29
NIM1K	-1.4738	1.77994	1.38e-30	2.26e-29
IMPDH1	1.57968	9.93572	2.3e-30	3.77e-29
AC034105.1	-3.09577	1.93499	7.09e-30	1.15e-28
CNRIP1	-1.44909	5.63938	7.31e-30	1.18e-28
MAL	-2.75171	3.79576	9.01e-30	1.45e-28
S100A2	4.22165	6.7098	1.21e-29	1.93e-28
ECI2	-1.40482	8.29931	1.23e-29	1.96e-28
MATN2	-1.78263	8.90652	1.27e-29	2.01e-28
EFHC2	-2.3199	2.80017	1.32e-29	2.09e-28
RUNX1	1.35513	9.60136	1.45e-29	2.28e-28
ASTN1	-3.22783	1.89114	1.78e-29	2.77e-28
RRM2	1.4662	10.2256	2.02e-29	3.13e-28
EIF3B	1.12259	11.7032	2.69e-29	4.14e-28
IL6R-AS1	-2.07765	0.536688	2.91e-29	4.46e-28
AC092652.2	-3.50566	0.131411	3.68e-29	5.61e-28
HOMER1	2.044	6.57312	4.22e-29	6.4e-28
SLC4A10	-2.97342	3.64472	6.46e-29	9.77e-28
NAT10	1.02171	9.87669	6.58e-29	9.91e-28
SYPL2	-1.97952	2.74835	7.73e-29	1.16e-27
SMYD5	1.02048	8.70746	8.38e-29	1.25e-27
CCL13	-2.57555	5.0751	2.05e-28	3.04e-27
PRMT3	1.20102	8.03586	2.34e-28	3.45e-27
AL161431.1	5.90294	6.55683	2.45e-28	3.6e-27
AP000697.1	4.93462	0.672712	2.82e-28	4.14e-27
AC009097.4	-2.23023	0.235746	5.22e-28	7.61e-27
EDNRB	-1.44995	6.72993	8.23e-28	1.19e-26
MMP3	4.6866	8.88338	8.78e-28	1.26e-26
GPT2	1.55906	9.63485	2.02e-27	2.89e-26
NCAPH	1.2304	8.05834	2.41e-27	3.42e-26
ANKRD40CL	-1.6856	7.12659	2.77e-27	3.93e-26
PIF1	1.58821	6.30194	3.29e-27	4.62e-26
ZEB1	-1.69913	7.63727	3.29e-27	4.62e-26
CCL15	-1.50995	5.8601	3.35e-27	4.68e-26
WISP1	2.63583	6.39358	3.7e-27	5.15e-26
COL4A6	-2.23631	3.82596	3.74e-27	5.19e-26
NPSR1-AS1	6.52294	3.44058	7.04e-27	9.72e-26
MCPH1-AS1	-1.41901	2.57337	7.12e-27	9.78e-26
IGKV1-39	-2.98865	3.11097	7.56e-27	1.04e-25
AC104958.2	2.75162	5.53694	8.28e-27	1.13e-25
CXCL3	2.9307	8.92611	1.09e-26	1.48e-25
CDK1	1.56601	9.35324	1.33e-26	1.8e-25
CACNA2D1	-1.92236	5.79847	1.33e-26	1.8e-25
NEFH	-1.79577	2.8395	1.7e-26	2.28e-25
PTPRF	-1.09112	12.1629	2.32e-26	3.1e-25
KIAA0408	-2.84464	0.234779	2.54e-26	3.38e-25
SLC51B	-4.19897	6.81485	7.68e-08	3.45e-25
AP003071.4	-2.12379	2.58857	2.66e-26	3.53e-25
HACD3	1.0268	10.4296	2.94e-26	3.88e-25
ANOS1	3.0393	6.53971	2.95e-26	3.88e-25
RNU6-1065P	-2.09236	-0.126387	3.37e-26	4.41e-25
PPARGC1A	-1.78615	7.28632	3.51e-26	4.58e-25
RECK	-1.33165	6.0075	5.27e-26	6.85e-25
RAB6B	-1.57907	5.68765	8.69e-26	1.13e-24
CDK5RAP1	1.01298	8.60433	1.17e-25	1.49e-24
GCNT3	-2.13492	10.444	1.54e-25	1.96e-24
AC005674.1	-2.0087	0.487236	2.14e-25	2.7e-24
CDKL2	-1.83913	2.50452	2.23e-25	2.81e-24
FRMD6-AS2	-3.06547	0.0163606	2.85e-25	3.58e-24
AC005256.1	6.00076	2.11242	3.04e-25	3.81e-24
UGT1A5	-3.68965	-0.314723	3.11e-25	3.87e-24
DSN1	1.18662	8.3607	4.54e-25	5.62e-24
ALKBH2	1.22498	7.40835	4.73e-25	5.83e-24
IGKV3D-15	-2.57186	3.84744	1.04e-24	1.27e-23
AC106900.2	2.39852	2.48951	1.09e-24	1.33e-23
CKS2	1.47774	9.21737	1.09e-24	1.33e-23
TMEM108	-1.73245	2.887	1.16e-24	1.4e-23
CARD14	2.1129	5.54553	1.2e-24	1.44e-23
RFK	-1.03158	9.16833	1.37e-24	1.65e-23
AC117489.1	-1.87752	1.7839	1.45e-24	1.74e-23
FOXD3-AS1	-2.67398	0.921785	1.65e-24	1.97e-23
LINC01748	3.88305	4.39945	1.77e-24	2.1e-23
PLK1	1.40772	9.482	2.4e-24	2.84e-23
SNCG	-1.89971	4.80864	3.81e-24	4.48e-23
LEF1	2.09651	7.24226	4.64e-24	5.43e-23
AL353572.1	-2.16003	0.117759	4.7e-24	5.47e-23
SHH	2.11659	8.10208	4.85e-24	5.63e-23
MIR17HG	2.82289	5.27856	5.01e-24	5.8e-23
KRT75	7.05349	4.28542	6.03e-24	6.92e-23
ST8SIA1	-1.58154	4.28854	6.48e-24	7.41e-23
ZNF677	-1.58824	4.12068	8.21e-24	9.36e-23
GAS1RR	-2.4371	1.24684	8.55e-24	9.72e-23
LY6G6F	5.10174	1.53871	8.8e-24	9.96e-23
NOC3L	1.11719	7.82278	9.33e-24	1.05e-22
CDON	-1.4335	5.76711	1.65e-23	1.86e-22
MSI2	1.07949	9.93507	2.08e-23	2.33e-22
SQLE	1.66803	9.92411	2.59e-23	2.89e-22
AC021218.1	2.36549	7.65104	2.96e-23	3.29e-22
MMS22L	1.32717	7.50218	3.31e-23	3.66e-22
SMCO2	2.50296	1.58319	3.47e-23	3.82e-22
NOP16	1.10006	8.57258	4.41e-23	4.82e-22
KIF24	1.02024	6.47325	4.48e-23	4.87e-22
HACD4	-1.39271	5.96875	4.53e-23	4.91e-22
PKD1L2	-2.23529	1.64927	4.59e-23	4.96e-22
OLFM1	-1.79225	5.85981	5.39e-23	5.81e-22
CHRNA1	-1.7458	3.73791	6.37e-23	6.84e-22
AC136428.1	-2.59072	2.2755	8.06e-23	8.61e-22
ANKRD53	-1.51582	1.94106	1.04e-22	1.11e-21
MS4A8	-2.12441	6.76397	1.37e-22	1.45e-21
ATP1A2	-4.92017	5.85736	2e-07	1.67e-21
SLC16A1-AS1	1.78623	5.30919	1.65e-22	1.75e-21
ERFE	3.31112	4.77785	1.79e-22	1.88e-21
MORC4	1.4365	8.60336	1.98e-22	2.08e-21
CEL	5.87212	8.61071	2.05e-22	2.15e-21
AC018629.1	3.27804	6.15762	2.1e-22	2.19e-21
SLC17A9	2.37504	9.06728	2.61e-22	2.71e-21
DNASE1L2	2.52042	3.71018	2.61e-22	2.71e-21
BGN	2.51976	11.3563	3.13e-22	3.24e-21
GPRIN2	-1.49805	6.55193	3.51e-22	3.62e-21
PPIL1	1.07458	8.72374	3.56e-22	3.66e-21
ZDHHC15	-1.86603	2.61236	3.66e-22	3.75e-21
EPB41L4A	-1.65577	4.99042	5.36e-22	5.47e-21
SH3PXD2A-AS1	2.87123	5.56055	5.37e-22	5.47e-21
ABCC1	1.0013	9.7789	7.31e-22	7.43e-21
GBX2	5.27324	1.95958	8.07e-22	8.17e-21
KCNC1	-1.91791	0.913013	1.1e-21	1.11e-20
PDE1A	-1.55142	5.23426	1.28e-21	1.29e-20
TMEM25	-1.50977	5.60328	1.3e-21	1.3e-20
SNHG25	4.77829	6.23311	1.49e-21	1.49e-20
SLC12A2	1.50387	12.438	1.63e-21	1.62e-20
SIGLEC1	-1.76381	6.63117	1.76e-21	1.75e-20
SNHG6	1.27518	9.49605	2.22e-21	2.2e-20
NFASC	-1.45464	7.05062	3.09e-21	3.06e-20
SNAP25	-2.49328	3.37993	3.16e-21	3.11e-20
DNAJC2	1.13512	8.71478	3.31e-21	3.26e-20
MAP2K6	-1.06267	7.90502	4.15e-21	4.07e-20
PLAC4	5.47058	5.64269	4.18e-21	4.08e-20
RP9P	1.00445	5.70015	4.36e-21	4.25e-20
INAVA	-1.04253	9.55096	4.86e-21	4.72e-20
RBMS3-AS3	-2.37644	0.109328	4.96e-21	4.8e-20
DUSP27	7.51703	8.81564	6.75e-21	6.5e-20
ATAD3B	1.29861	8.31682	6.81e-21	6.54e-20
IGLV10-54	-2.81309	6.3652	7.28e-21	6.97e-20
AMH	4.16271	5.3581	8.9e-21	8.49e-20
LINC01588	-1.10556	4.75266	1.05e-20	9.98e-20
MCOLN2	-1.71301	6.91151	1.44e-20	1.37e-19
CPNE1	1.67869	11.1462	1.5e-20	1.42e-19
AC134312.1	-2.22581	0.811042	2.15e-20	2.02e-19
CCL21	-2.06147	7.62589	2.48e-20	2.33e-19
NUTM2D	-1.26385	2.37561	2.53e-20	2.37e-19
C3orf18	-1.16806	4.9819	2.85e-20	2.66e-19
IGKV1OR-2	-2.27378	-0.198989	2.93e-20	2.72e-19
MPP3	1.46529	5.3073	3.19e-20	2.96e-19
SRM	1.39429	9.8312	3.35e-20	3.1e-19
ADRA2A	-1.82331	7.45263	3.62e-20	3.34e-19
TRGV4	-2.03727	0.579772	4.08e-20	3.75e-19
TSC22D3	-1.24659	9.111	4.25e-20	3.9e-19
FIGN	-1.67711	3.16168	4.57e-20	4.18e-19
AC136475.3	3.6009	5.91457	5.27e-20	4.81e-19
SLC7A1	1.08582	10.6238	6.42e-20	5.83e-19
LURAP1	-1.38631	2.01118	6.45e-20	5.84e-19
GRINA	1.26304	11.1913	8.31e-20	7.5e-19
RCBTB1	1.02356	8.12137	1.06e-19	9.56e-19
SNTG2	-2.23959	0.757883	1.13e-19	1.01e-18
AC008609.1	-2.56541	0.308533	1.52e-19	1.36e-18
AL662844.4	-1.11955	3.83399	1.94e-19	1.73e-18
ANTXR2	-1.11616	9.59895	2.01e-19	1.78e-18
GPR157	1.22437	8.05225	2.03e-19	1.8e-18
AL162413.1	6.61964	2.15745	2.27e-19	2e-18
FOSL1	2.59962	7.45178	3.27e-19	2.84e-18
ZFP69B	1.26714	4.64829	3.3e-19	2.86e-18
NAP1L1	1.06423	11.7454	3.6e-19	3.12e-18
FO393418.1	-1.50229	0.403591	5.42e-19	4.66e-18
TP53INP1	-1.04964	8.01101	8.66e-19	7.44e-18
SNORD12B	3.28402	1.88066	9.36e-19	8.02e-18
AC083900.1	-1.81239	1.33288	9.49e-19	8.11e-18
ZNF396	-1.03126	4.18825	1.17e-18	9.97e-18
CYTOR	1.35422	6.48893	1.43e-18	1.21e-17
KRTAP5-4	3.57259	0.866026	1.75e-18	1.48e-17
BDH2	-1.01264	7.26242	2.2e-18	1.84e-17
ZNF280A	4.72855	1.2603	2.32e-18	1.94e-17
CLDN11	-1.90006	4.47073	2.54e-18	2.11e-17
STOM	-1.11659	9.75937	3.11e-18	2.57e-17
LILRA4	-1.92712	1.86855	3.65e-18	3.01e-17
ARFGAP1	1.14669	10.329	3.83e-18	3.14e-17
CMAHP	-1.53356	5.84108	4.12e-18	3.36e-17
GPR142	-1.93137	0.315567	4.12e-18	3.36e-17
ARHGEF19	1.33763	7.62364	5.57e-18	4.53e-17
ZP3	1.71638	7.08408	6.36e-18	5.15e-17
SNORA71A	6.02772	4.9484	6.79e-18	5.49e-17
URAHP	1.55558	2.91489	7.49e-18	6.03e-17
LY6H	-1.97363	2.80871	7.53e-18	6.05e-17
CHD7	1.04325	9.30033	8.87e-18	7.11e-17
ITPKA	-1.43734	7.36042	9.57e-18	7.65e-17
DPCD	1.07048	7.56323	1.19e-17	9.5e-17
LINC01829	-2.34843	0.726255	1.29e-17	1.02e-16
IGHV5-51	-2.20156	8.87079	1.63e-17	1.28e-16
ANGPT1	-1.42869	4.86846	1.73e-17	1.36e-16
AL121832.3	1.6502	4.75077	1.8e-17	1.41e-16
AC078860.1	2.8849	1.94401	2.85e-17	2.22e-16
AL024507.2	1.10117	2.78733	3.44e-17	2.67e-16
HSP90AB3P	1.9872	4.80033	3.61e-17	2.79e-16
TP53RK	1.11353	8.65382	3.61e-17	2.79e-16
AC005264.1	3.04074	0.604792	4.21e-17	3.22e-16
FOXS1	1.5695	4.40234	4.61e-17	3.51e-16
GALNT17	-1.71918	4.34132	4.73e-17	3.6e-16
AC004988.1	3.61875	1.65528	6.6e-17	5e-16
RNU6-403P	4.35956	0.306103	7.7e-17	5.82e-16
GNG11	-1.13693	7.0118	1e-16	7.5e-16
PDPN	1.66854	8.0969	1.01e-16	7.6e-16
TMIE	-1.45845	1.59478	1.02e-16	7.65e-16
TACR1	-2.06197	2.77216	1.1e-16	8.17e-16
AC069222.1	2.37823	2.09311	1.41e-16	1.04e-15
PLPP4	2.8652	4.78727	1.47e-16	1.08e-15
LINC01703	1.63199	2.96537	1.51e-16	1.11e-15
FTH1P2	-1.31984	2.71635	1.58e-16	1.15e-15
YPEL4	-1.41992	2.61112	1.6e-16	1.16e-15
UCKL1	1.19098	9.38817	1.6e-16	1.17e-15
SP6	1.90727	8.06885	1.66e-16	1.2e-15
IKZF1	-1.42121	6.78488	1.82e-16	1.32e-15
FAM131C	2.57939	2.59962	1.87e-16	1.35e-15
RASSF6	-1.08131	8.0779	2.13e-16	1.54e-15
RHOF	-1.41284	6.1531	2.79e-16	2e-15
AC092868.1	-1.46963	4.76092	3.49e-16	2.49e-15
PODNL1	1.64991	6.16636	3.63e-16	2.58e-15
GAS5	1.22399	11.0177	3.72e-16	2.64e-15
FOXA2	1.50169	8.82069	3.76e-16	2.66e-15
ENPP2	-1.38579	7.71148	4.92e-16	3.47e-15
AC068580.2	5.05039	0.896004	5.4e-16	3.79e-15
MRGPRE	-2.28664	-0.0788912	6.46e-16	4.49e-15
OMD	-2.35149	3.85114	7.16e-16	4.95e-15
LIME1	1.57893	5.41601	7.75e-16	5.34e-15
EXOSC4	1.31253	8.55893	8.38e-16	5.76e-15
XPOTP1	1.87964	1.17128	8.78e-16	6e-15
EVI2B	-1.37412	6.60625	8.97e-16	6.11e-15
IGHV3-13	-2.27557	5.34815	9.32e-16	6.34e-15
TMEM196	-2.54372	-0.277667	1.05e-15	7.16e-15
FTH1P3	-1.09708	2.64217	1.08e-15	7.29e-15
LINC00390	-1.84668	0.32096	1.32e-15	8.92e-15
AOC4P	-1.63162	0.882119	1.39e-15	9.38e-15
SSTR5	4.09645	4.1656	1.43e-15	9.6e-15
FABP6	-2.03532	7.09756	1.44e-15	9.67e-15
CAMK4	-1.31381	4.88678	1.65e-15	1.1e-14
AC021074.1	3.56454	4.99376	1.81e-15	1.21e-14
SYT7	1.69883	9.37897	1.9e-15	1.27e-14
GLI3	-1.56949	5.89107	1.92e-15	1.28e-14
TNFSF15	1.2464	7.45623	1.93e-15	1.28e-14
AR	-1.67296	4.59259	1.95e-15	1.29e-14
ZCWPW2	-1.02271	2.41574	2.16e-15	1.43e-14
PRKCG	3.59422	4.59791	2.22e-15	1.46e-14
ICAM3	-1.49069	4.39276	2.35e-15	1.54e-14
TENT5A	-1.05058	8.36023	3.05e-15	1.99e-14
TSPEAR-AS2	2.948	3.32983	3.1e-15	2.01e-14
AL161719.1	-1.44668	0.506366	3.23e-15	2.09e-14
RNF139-AS1	1.2939	4.48739	3.27e-15	2.11e-14
AC133785.1	4.11513	1.03027	3.66e-15	2.36e-14
WFDC10A	3.50601	0.690557	3.85e-15	2.48e-14
BOC	-1.51395	6.5638	3.98e-15	2.56e-14
ATP2B2	-1.93173	0.990447	4.08e-15	2.62e-14
AC036108.2	-2.09262	0.281783	4.25e-15	2.72e-14
TMEM158	1.53535	7.02001	4.97e-15	3.17e-14
SYNE1	-1.33478	7.80803	5.2e-15	3.31e-14
ABCB6	1.11865	5.72366	6.28e-15	3.99e-14
SCARA3	-1.44696	6.71137	6.39e-15	4.05e-14
TUBA1A	-1.19346	9.82263	7.15e-15	4.53e-14
COL5A2	1.81493	10.8878	8.33e-15	5.24e-14
AC093908.1	2.90302	4.31392	1.14e-14	7.11e-14
PPP1R13L	1.16034	8.69638	1.15e-14	7.18e-14
AC244205.1	-1.83909	0.796626	1.23e-14	7.66e-14
SNORD101	1.89511	1.68696	1.29e-14	8.04e-14
DMRT3	4.11269	1.60897	1.62e-14	1e-13
PADI3	5.16938	5.44251	1.64e-14	1.02e-13
DSG1	2.45108	2.66089	1.66e-14	1.02e-13
SENCR	-1.20722	1.75096	1.67e-14	1.03e-13
KRT83	4.12925	1.94599	1.75e-14	1.08e-13
JPH3	-1.76773	2.27307	2e-14	1.23e-13
FTH1P5	-1.38851	1.76656	2.04e-14	1.25e-13
CCR8	2.09967	2.29737	2.04e-14	1.25e-13
Z73417.1	2.66931	2.45582	2.13e-14	1.3e-13
CYP8B1	-1.7594	0.342099	2.36e-14	1.44e-13
PHLDA2	1.52755	8.95139	2.82e-14	1.72e-13
AC125616.1	3.11187	1.28361	2.88e-14	1.75e-13
RAD51AP2	2.1226	1.94588	3.57e-14	2.17e-13
RANBP17	1.51892	5.86333	3.61e-14	2.19e-13
AC002116.2	1.09213	2.73165	3.87e-14	2.34e-13
AC025165.1	-1.5328	1.40179	3.93e-14	2.37e-13
ZSCAN18	-1.36715	6.51083	5.03e-14	3.03e-13
RIN1	1.09571	8.1088	5.81e-14	3.49e-13
TSTA3	1.20196	10.915	5.87e-14	3.52e-13
AL121845.3	1.60778	3.61682	6.2e-14	3.71e-13
AKAP4	4.80897	1.19813	6.62e-14	3.96e-13
THBS2	2.36235	10.5178	6.81e-14	4.06e-13
CDIP1	-1.19447	7.30228	7.32e-14	4.35e-13
AC104687.2	-1.34611	0.148141	7.64e-14	4.54e-13
FCGRT	-1.04208	11.3707	9.02e-14	5.34e-13
ATP8B2	-1.08414	7.36323	9.32e-14	5.51e-13
AF064858.3	3.5337	4.65914	9.84e-14	5.8e-13
IGHV3-53	-2.05632	6.35218	1e-13	5.9e-13
CILP	-2.2004	6.73372	1.02e-13	6e-13
BRSK2	2.63765	5.93767	1.21e-13	7.09e-13
AC010789.1	4.58652	0.843337	1.22e-13	7.09e-13
AC097658.1	2.10962	3.80624	1.33e-13	7.75e-13
RYKP1	3.11687	1.77921	1.62e-13	9.36e-13
LAGE3	1.13567	8.05876	1.76e-13	1.01e-12
TLR10	-1.78507	3.83967	2.09e-13	1.2e-12
LINC01833	4.26843	3.77395	2.45e-13	1.4e-12
LAPTM4B	1.39275	10.8029	2.49e-13	1.43e-12
AC083809.1	2.77136	2.75696	2.68e-13	1.53e-12
AC009509.1	-1.84165	3.48663	2.68e-13	1.53e-12
VLDLR	-1.19776	6.35742	3.13e-13	1.77e-12
TMEM191A	1.43765	5.65583	3.15e-13	1.78e-12
IGLV4-69	-2.12803	7.55485	3.27e-13	1.84e-12
NKILA	1.71017	4.95369	3.93e-13	2.21e-12
MALAT1	3.47725	12.9102	4.09e-13	2.29e-12
TCTE3	1.15164	4.71188	4.26e-13	2.38e-12
LPAL2	1.41235	3.36657	4.38e-13	2.45e-12
AC092809.2	-1.48469	0.255708	4.8e-13	2.68e-12
IGHV4-28	-1.90984	5.49687	5.67e-13	3.15e-12
KCNJ11	1.46856	5.55002	5.77e-13	3.2e-12
GS1-124K5.4	1.26377	3.6389	6.11e-13	3.38e-12
WASIR2	2.71237	1.22713	6.12e-13	3.38e-12
GPCPD1	1.27839	9.6553	6.2e-13	3.41e-12
MCF2L-AS1	1.44322	5.62325	6.42e-13	3.52e-12
AC083880.1	1.29614	2.20866	6.45e-13	3.53e-12
CDCA2	1.16202	6.91253	6.57e-13	3.59e-12
DPY19L1P1	1.14475	4.83992	6.98e-13	3.81e-12
HIST1H4B	6.48331	4.1409	7.3e-13	3.97e-12
CAPN12	1.75321	6.0188	7.55e-13	4.1e-12
PHYHD1	-1.33681	4.54039	7.91e-13	4.29e-12
MIR135B	3.16733	-0.215543	8.09e-13	4.38e-12
KCNS3	-1.14725	6.59726	8.81e-13	4.75e-12
AC093904.2	2.55085	1.06065	9.53e-13	5.13e-12
RASSF10	2.3195	6.17195	1.04e-12	5.57e-12
AL031600.1	1.52087	2.31029	1.08e-12	5.79e-12
SLC39A5	-1.38148	9.8669	1.08e-12	5.79e-12
AC104785.1	1.39853	1.5854	1.3e-12	6.94e-12
SLCO1C1	-1.41732	1.65526	1.36e-12	7.22e-12
VGF	3.00538	6.02347	1.36e-12	7.23e-12
ABCA9-AS1	3.89786	1.5365	1.44e-12	7.63e-12
AC116407.4	1.38095	2.22729	1.45e-12	7.67e-12
RNU6-1161P	2.7065	0.200523	1.53e-12	8.06e-12
SERPINE2	1.3629	9.82266	1.56e-12	8.19e-12
APCDD1	2.43888	9.93254	1.68e-12	8.82e-12
HELLPAR	2.39677	4.72964	1.91e-12	9.98e-12
SMPX	-2.35991	3.46963	2.09e-12	1.09e-11
AL512652.2	2.06257	0.661925	2.72e-12	1.42e-11
AC008763.1	1.80471	1.70128	2.74e-12	1.42e-11
SNCB	-1.961	0.427468	3.22e-12	1.67e-11
AC002451.1	-1.28564	0.947161	3.29e-12	1.7e-11
CBX3P9	1.60692	1.89196	3.34e-12	1.72e-11
AC098859.1	2.21538	1.31953	3.55e-12	1.83e-11
RHBDL1	1.56984	5.73545	3.59e-12	1.84e-11
ORM2	2.91326	1.97076	3.82e-12	1.96e-11
CALCA	5.43457	5.16035	3.93e-12	2.01e-11
HSPE1P5	2.63169	0.261846	4.02e-12	2.05e-11
CD27	-1.47868	5.66914	4.15e-12	2.11e-11
SLC7A5P1	1.43742	2.30752	4.16e-12	2.11e-11
GPR12	-2.42448	-0.069604	4.29e-12	2.17e-11
TRPV4	1.55936	4.72726	4.53e-12	2.29e-11
CXCL6	2.33863	4.99594	4.61e-12	2.33e-11
FADS6	-2.3368	3.60389	4.96e-12	2.5e-11
PCDHGC3	-1.20819	6.5454	5.33e-12	2.68e-11
AC036176.3	4.30858	0.727451	5.4e-12	2.72e-11
PRPH2	-1.12064	2.6993	6.99e-12	3.48e-11
AC134879.2	-2.10642	2.50544	7.2e-12	3.59e-11
AL109741.2	2.74688	2.26624	7.74e-12	3.84e-11
LINC01348	2.02949	3.66031	8.18e-12	4.05e-11
AADAT	1.12195	6.38008	8.36e-12	4.13e-11
ITLN1	-2.28002	9.99365	8.53e-12	4.21e-11
AC073529.1	1.32699	2.55972	8.54e-12	4.21e-11
AC091806.1	1.60503	1.2078	8.83e-12	4.35e-11
POU3F2	3.0095	1.1925	1.16e-11	5.67e-11
SUZ12P1	1.25519	6.3382	1.19e-11	5.84e-11
SUSD2	-1.35303	6.18873	1.3e-11	6.36e-11
CDIPTOSP	2.62323	1.34007	1.32e-11	6.41e-11
SV2A	-1.03644	5.02808	1.32e-11	6.42e-11
PIGR	-1.70262	15.2373	1.33e-11	6.48e-11
CD4	-1.01991	8.5668	1.36e-11	6.6e-11
DCLK3	1.17367	2.87038	1.43e-11	6.91e-11
IGLV1-62	-2.01104	0.0565098	1.43e-11	6.91e-11
AL023803.3	2.20358	0.39118	1.49e-11	7.18e-11
FAM222A	1.37719	6.84338	1.52e-11	7.32e-11
AL355112.1	3.08312	0.408656	1.57e-11	7.56e-11
RPL37P23	1.75024	2.49954	1.59e-11	7.64e-11
A1BG-AS1	-1.0384	2.41051	1.74e-11	8.32e-11
ZDHHC20-IT1	1.89002	1.37939	1.74e-11	8.32e-11
BEAN1	2.14926	3.81552	1.93e-11	9.18e-11
GCC2-AS1	1.03355	1.54742	2.26e-11	1.07e-10
RIPOR2	-1.19794	5.9152	2.33e-11	1.1e-10
SNORA74D	6.09963	2.12065	2.35e-11	1.11e-10
DIAPH2-AS1	3.17971	2.50554	2.63e-11	1.24e-10
TXNP6	2.31846	2.42903	2.65e-11	1.25e-10
ADGRD1	-1.36033	5.34745	2.71e-11	1.27e-10
KIAA1549L	2.56436	5.64483	2.73e-11	1.28e-10
CCL26	2.31662	3.45593	2.82e-11	1.32e-10
PRDM13	3.95944	2.33272	2.84e-11	1.32e-10
MESP2	-1.31516	2.96552	3.14e-11	1.46e-10
ZNF134	-1.06724	6.19358	3.45e-11	1.59e-10
COLEC11	-1.21431	3.49084	3.49e-11	1.61e-10
AL365181.3	1.13729	8.40015	3.82e-11	1.75e-10
AC009533.1	1.05063	5.27881	3.95e-11	1.81e-10
AC110285.3	3.59819	1.30185	4.13e-11	1.89e-10
AC114811.2	1.84811	2.63931	4.24e-11	1.94e-10
CASC15	1.5772	5.20147	4.44e-11	2.03e-10
AL023803.2	1.20595	2.399	4.63e-11	2.11e-10
SBK1	1.88643	6.20372	5.14e-11	2.34e-10
RPL35P2	2.55076	4.16509	5.32e-11	2.41e-10
BHLHA9	4.4659	1.08571	6.18e-11	2.79e-10
CYP39A1	1.30163	6.73312	6.53e-11	2.95e-10
LINC01091	1.52476	4.40644	6.73e-11	3.04e-10
AC087277.2	-1.57777	0.73569	6.79e-11	3.06e-10
BX640514.2	2.28011	1.22275	7.06e-11	3.17e-10
CKB	-1.51079	12.6836	7.7e-11	3.45e-10
AC003991.1	-1.49229	2.39613	7.81e-11	3.5e-10
SLC12A5-AS1	2.14088	1.77711	8.15e-11	3.65e-10
CTSW	-1.34132	5.14244	8.43e-11	3.76e-10
FAM180A	-1.38526	3.27284	8.62e-11	3.84e-10
MAGEA6	9.44375	5.44842	8.71e-11	3.88e-10
AC092964.1	3.9435	2.39745	8.83e-11	3.93e-10
FGFR4	1.22275	10.2041	9.54e-11	4.24e-10
FLJ16779	2.68193	3.02012	9.56e-11	4.24e-10
EPHX3	1.98446	3.34968	9.91e-11	4.39e-10
RPL35AP21	4.04244	1.50866	1e-10	4.43e-10
MMP25-AS1	1.3014	5.83801	1.18e-10	5.18e-10
ZNF366	-1.04762	3.62795	1.18e-10	5.18e-10
KLK12	3.17163	5.96818	1.2e-10	5.26e-10
CHST15	-1.00603	7.48692	1.25e-10	5.46e-10
AL512361.1	3.31107	0.778103	1.31e-10	5.73e-10
AC007639.1	2.10891	1.51553	1.34e-10	5.86e-10
MITF	-1.1022	6.21136	1.45e-10	6.29e-10
AC022075.1	2.04694	5.39137	1.6e-10	6.96e-10
MACORIS	-1.26314	0.291522	1.68e-10	7.28e-10
CLLU1	3.63293	0.921834	1.76e-10	7.63e-10
KLRG2	3.5749	3.42559	1.78e-10	7.69e-10
AC136475.5	1.91923	1.82929	1.79e-10	7.74e-10
CD3G	-1.06887	5.06634	1.81e-10	7.78e-10
C7orf69	3.09716	-0.099632	1.89e-10	8.12e-10
C3orf67	1.79058	5.31834	1.91e-10	8.19e-10
RNU5A-1	9.50094	5.76514	1.95e-10	8.37e-10
RNU4ATAC	4.14215	2.23937	1.99e-10	8.52e-10
KRT18P4	1.1263	1.89311	2.04e-10	8.74e-10
GAPDHP38	2.3302	2.43341	2.28e-10	9.7e-10
GNG4	2.54122	8.67121	2.4e-10	1.02e-09
AL136418.1	2.31246	2.65574	2.53e-10	1.07e-09
NYAP1	-1.19665	2.57049	2.55e-10	1.08e-09
LINC01426	1.8808	2.85614	2.62e-10	1.11e-09
MYH2	-2.19422	0.130942	2.66e-10	1.12e-09
IGFL3	3.56893	1.81967	2.83e-10	1.19e-09
AL139384.1	1.36649	4.24325	2.99e-10	1.25e-09
AL008723.3	2.66954	0.529331	3.11e-10	1.3e-09
THBS4	-1.85636	7.1132	3.42e-10	1.43e-09
AL355994.2	2.59797	0.255626	3.72e-10	1.55e-09
NAALAD2	-1.08783	2.80193	3.88e-10	1.61e-09
AP006284.1	1.5423	4.20023	4.28e-10	1.77e-09
OR2A7	-1.10226	3.0525	4.4e-10	1.82e-09
NAT8	-2.20876	2.69063	4.48e-10	1.85e-09
NRP2	-1.02915	8.54164	4.85e-10	1.99e-09
AC138409.1	3.40225	2.43002	4.91e-10	2.02e-09
AKR1C8P	3.34046	0.756095	4.97e-10	2.04e-09
GAPDHP68	2.72638	1.88758	5.25e-10	2.15e-09
TBX20	3.22202	2.31219	5.62e-10	2.29e-09
TMEM52B	1.77875	2.05353	5.66e-10	2.31e-09
CDH6	1.006	5.66546	5.96e-10	2.43e-09
MUC21	4.46815	0.480379	6.2e-10	2.51e-09
IGKV1-33	-2.09145	2.12761	6.33e-10	2.56e-09
ANP32BP1	1.63182	1.71093	6.5e-10	2.62e-09
AL008723.1	2.49759	1.19903	7.12e-10	2.87e-09
AC131971.1	3.09622	2.91659	7.36e-10	2.96e-09
FGGY	1.70666	8.50741	7.4e-10	2.97e-09
AC091769.1	-1.81897	0.101624	8.96e-10	3.58e-09
AC092143.3	1.57595	0.833545	9.06e-10	3.61e-09
GLYATL1P2	2.99954	-0.204521	9.41e-10	3.74e-09
AL121895.1	2.47616	2.42363	9.64e-10	3.83e-09
MAGEA11	6.19194	4.13191	9.73e-10	3.86e-09
SMIM36	2.62319	-0.253159	9.75e-10	3.86e-09
MANEAL	1.02821	7.83722	9.98e-10	3.94e-09
AC004923.4	1.05941	1.98034	1.09e-09	4.29e-09
BOLA2P1	4.00928	0.383892	1.09e-09	4.3e-09
AL442067.1	2.24395	0.905997	1.12e-09	4.41e-09
FAM19A5	1.24476	5.50654	1.15e-09	4.5e-09
GNL3LP1	1.27541	0.884263	1.17e-09	4.57e-09
AC073861.1	1.51838	7.32174	1.34e-09	5.23e-09
CYP11A1	-1.52894	1.71297	1.36e-09	5.31e-09
AC007938.3	1.2499	2.22713	1.4e-09	5.46e-09
F5	2.39062	6.48708	1.45e-09	5.62e-09
MIR4786	-1.24544	-0.049325	1.55e-09	5.98e-09
IGLV4-60	-2.06431	5.49474	1.65e-09	6.4e-09
SAA4	3.25963	0.923429	1.67e-09	6.46e-09
SNORD67	2.75232	0.738519	1.77e-09	6.83e-09
CBWD4P	1.35997	2.02398	1.84e-09	7.09e-09
EFCAB1	-1.38307	0.995983	1.86e-09	7.16e-09
HSPD1P2	2.95024	0.576657	2.06e-09	7.9e-09
AC004890.1	1.20503	1.9233	2.1e-09	8.07e-09
POLD2P1	2.70262	0.607497	2.14e-09	8.2e-09
AL139035.1	1.12787	1.65957	2.16e-09	8.28e-09
HPDL	1.3537	7.66402	2.24e-09	8.54e-09
AP001972.1	-1.13142	0.0956436	2.3e-09	8.76e-09
AL121906.2	1.2021	1.83902	2.33e-09	8.89e-09
RPLP0P6	1.42067	7.52662	2.38e-09	9.07e-09
AC126773.3	3.16754	0.0543767	2.44e-09	9.29e-09
PHYHIP	-1.20301	4.01958	2.47e-09	9.37e-09
AC106886.1	1.7014	1.12708	2.59e-09	9.83e-09
AL136115.2	3.09	1.8415	2.71e-09	1.02e-08
AL365223.1	2.62608	0.684858	2.91e-09	1.1e-08
FGF9	-1.42155	3.45379	2.94e-09	1.11e-08
AL109614.1	1.77844	2.28565	2.99e-09	1.13e-08
VSIG8	1.92402	2.20707	3.02e-09	1.14e-08
CDK15	-1.4374	1.77332	3.26e-09	1.23e-08
SBSN	3.10954	2.02808	3.3e-09	1.24e-08
AC024884.2	1.71819	0.311581	3.3e-09	1.24e-08
AP000894.1	3.36236	0.15271	3.32e-09	1.24e-08
UHRF2P1	5.53702	2.31113	3.43e-09	1.28e-08
RPS26P28	2.00063	1.88255	4.57e-09	1.7e-08
AC120498.10	-1.36144	1.78614	4.59e-09	1.7e-08
AC063952.2	2.09633	0.509278	4.64e-09	1.72e-08
AL121885.2	3.79267	0.383015	4.65e-09	1.72e-08
SCART1	1.19338	4.0727	4.67e-09	1.72e-08
RNA5SP149	6.67636	1.7794	4.78e-09	1.76e-08
ZDHHC4P1	4.12532	1.641	4.79e-09	1.76e-08
MMP12	1.79789	9.47179	4.87e-09	1.79e-08
MEGF11	2.23389	3.81015	4.9e-09	1.8e-08
AL133230.1	1.94874	3.1847	5.1e-09	1.87e-08
AC006213.2	-1.15077	1.37669	5.28e-09	1.93e-08
GOLT1A	1.06387	6.98925	5.4e-09	1.97e-08
AC008115.3	1.12522	3.27289	5.43e-09	1.98e-08
SLED1	2.97296	0.946277	5.46e-09	1.99e-08
GRIN3B	1.50701	1.84914	5.92e-09	2.16e-08
YY1P1	3.84889	0.559618	5.96e-09	2.17e-08
UBE2V1P2	1.50012	1.48549	6.05e-09	2.19e-08
AC087222.1	1.8467	1.52835	7.14e-09	2.58e-08
AC080129.2	1.29433	2.33997	7.35e-09	2.65e-08
AC009630.2	2.2935	-0.29004	7.57e-09	2.72e-08
SNRPN	-1.03765	7.14348	8.17e-09	2.93e-08
AL136531.2	-1.22822	2.94392	8.22e-09	2.94e-08
CCT5P2	2.19222	0.7877	8.22e-09	2.94e-08
KLHL10	-1.3866	0.109934	8.4e-09	2.99e-08
C19orf81	2.81885	0.958651	9.25e-09	3.28e-08
SEMG2	5.22484	1.47854	9.3e-09	3.29e-08
AC137894.1	2.24395	0.836917	9.41e-09	3.33e-08
AC099789.1	2.36999	0.533831	9.47e-09	3.35e-08
KCNV2	2.0983	0.839762	9.93e-09	3.5e-08
LINC02404	4.59985	0.566143	1.03e-08	3.65e-08
LINC00671	-1.32279	-0.100136	1.05e-08	3.68e-08
RPS7P15	2.85636	0.951775	1.09e-08	3.83e-08
HSP90B2P	1.37189	3.12152	1.11e-08	3.89e-08
AC021231.2	1.90241	1.25158	1.17e-08	4.1e-08
MIR34AHG	1.68404	0.529517	1.18e-08	4.12e-08
CYCSP34	1.26133	2.65602	1.21e-08	4.23e-08
RAB6D	-1.03452	1.66193	1.23e-08	4.3e-08
SEC22B4P	-1.14603	0.105316	1.31e-08	4.57e-08
RNU6-1223P	1.64183	0.261466	1.37e-08	4.76e-08
LINC00106	1.18029	3.65259	1.38e-08	4.79e-08
MRC1	-1.21615	7.6251	1.46e-08	5.05e-08
RIBC2	1.23537	4.30177	1.51e-08	5.21e-08
KRT38	4.0968	0.263005	1.54e-08	5.32e-08
TRIM7	2.08125	6.39177	1.55e-08	5.36e-08
GPC5	-1.62526	1.4224	1.56e-08	5.37e-08
UROC1	2.55721	0.428359	1.56e-08	5.37e-08
CPAMD8	-1.13747	4.36489	1.68e-08	5.76e-08
AL807757.2	2.69615	0.998615	1.71e-08	5.86e-08
RPL21P67	2.64596	0.714588	1.73e-08	5.94e-08
RPL34P33	2.41633	1.33189	1.81e-08	6.2e-08
LINC01266	-1.60113	0.318654	1.85e-08	6.3e-08
SLC38A3	2.58101	3.56576	2.01e-08	6.86e-08
IGHV3-42	-1.7439	1.25595	2.06e-08	6.99e-08
RF00493	3.85498	0.495082	2.06e-08	6.99e-08
HNRNPA1P50	1.85844	1.14041	2.4e-08	8.1e-08
AC009148.1	1.22813	2.29745	2.49e-08	8.4e-08
AC091153.3	1.20961	1.41523	2.59e-08	8.73e-08
AL359182.1	-1.19982	0.534467	2.72e-08	9.14e-08
HSPA6	1.56072	5.79395	2.82e-08	9.47e-08
CD55	1.17922	10.8286	2.84e-08	9.52e-08
AC020763.1	2.08844	0.0427908	2.86e-08	9.59e-08
AC004080.5	-1.21169	-0.0950077	2.91e-08	9.73e-08
AL592295.1	1.18722	2.02473	3.25e-08	1.08e-07
AC092127.1	3.78914	1.86791	3.5e-08	1.16e-07
SNORD1B	1.81477	0.000451848	3.59e-08	1.19e-07
PDE6G	-1.08528	2.66798	3.87e-08	1.28e-07
OBP2A	2.87441	0.884744	4e-08	1.32e-07
KARSP1	4.16908	0.486485	4.08e-08	1.35e-07
NODAL	1.94747	2.3019	4.3e-08	1.41e-07
AL391095.3	1.46569	1.10535	4.38e-08	1.44e-07
IGHG3	2.11722	10.7353	4.39e-08	1.44e-07
AC008105.1	1.15409	2.51358	4.5e-08	1.48e-07
RNU4-25P	3.68969	0.221074	4.57e-08	1.5e-07
AP002981.1	2.06897	-0.179103	4.7e-08	1.53e-07
AC106772.2	-1.78033	0.970028	4.71e-08	1.54e-07
CYTL1	-1.14695	2.75447	4.94e-08	1.61e-07
HOXC13	4.73443	1.51616	5.31e-08	1.73e-07
AC006329.2	3.17338	0.0304596	5.34e-08	1.74e-07
AC079140.2	1.30131	1.9612	5.57e-08	1.81e-07
PHF2P2	3.77347	0.653993	5.69e-08	1.84e-07
AC011933.2	4.31233	2.15557	6.49e-08	2.1e-07
CDH15	1.50826	1.96237	6.61e-08	2.13e-07
OSBPL10-AS1	3.57832	1.0628	7.14e-08	2.3e-07
HSP90AB2P	1.0981	3.85418	7.72e-08	2.47e-07
RNF144A-AS1	1.20295	2.52157	7.75e-08	2.48e-07
AC011495.1	1.59721	4.12926	8.31e-08	2.65e-07
AC239803.3	1.59611	0.512178	8.92e-08	2.84e-07
AC005281.1	-1.27139	0.106898	8.97e-08	2.85e-07
AC008813.1	1.74622	0.553717	9.56e-08	3.03e-07
CDA	-1.04132	7.47034	9.97e-08	3.16e-07
CRB1	-1.49474	0.100592	1.01e-07	3.19e-07
PTGES3P4	2.0801	0.994927	1.01e-07	3.19e-07
AP006545.1	1.2449	1.4789	1.02e-07	3.22e-07
PPIHP1	2.06789	0.800302	1.04e-07	3.27e-07
RPS4XP14	1.4103	2.40946	1.04e-07	3.27e-07
AL022322.1	1.00026	4.43347	1.05e-07	3.3e-07
PLK5	2.09055	1.6188	1.06e-07	3.33e-07
AC091042.1	1.40951	1.36194	1.07e-07	3.35e-07
TBC1D29P	1.70611	0.323771	1.13e-07	3.53e-07
AC127024.3	2.83232	0.835474	1.14e-07	3.57e-07
SOSTDC1	-1.33915	6.10015	1.15e-07	3.59e-07
AC084262.1	2.42009	0.285936	1.15e-07	3.59e-07
GLYATL1P4	2.25511	0.794761	1.17e-07	3.64e-07
TBX5	4.10058	1.14723	1.2e-07	3.74e-07
PDE10A	1.51816	5.56892	1.2e-07	3.74e-07
SP3P	3.2379	0.104154	1.22e-07	3.79e-07
AL138831.3	1.20381	2.59625	1.26e-07	3.92e-07
ZNF726	-1.23103	2.49249	1.29e-07	4.01e-07
TRAV29DV5	-1.11841	1.0876	1.4e-07	4.32e-07
AGAP11	-1.29114	0.0296547	1.42e-07	4.4e-07
LINC00239	1.14801	4.23826	1.46e-07	4.52e-07
PAX2	2.7558	1.18327	1.47e-07	4.54e-07
SVOP	-1.61164	2.1177	1.6e-07	4.92e-07
LCN1	2.39395	0.218409	1.6e-07	4.93e-07
HDAC1P2	2.19612	0.693297	1.63e-07	5e-07
ICAM5	1.54382	3.28956	1.81e-07	5.54e-07
DDX53	5.06636	0.78284	1.82e-07	5.58e-07
LINC02525	3.35624	1.18608	1.85e-07	5.64e-07
AL359976.1	2.82787	0.282713	1.88e-07	5.74e-07
AC011379.1	3.21687	2.51662	1.94e-07	5.91e-07
RPL36AP13	1.86689	0.344479	2.04e-07	6.21e-07
LINC01967	2.98792	0.540871	2.1e-07	6.37e-07
EPGN	2.67744	0.467204	2.12e-07	6.45e-07
MT-TS2	3.01139	0.787186	2.14e-07	6.49e-07
SYNE4	1.57604	6.48822	2.2e-07	6.65e-07
IGHV3-50	-1.7114	0.275888	2.26e-07	6.82e-07
SNORD83A	1.46727	1.16637	2.31e-07	6.97e-07
Z97192.1	2.56252	1.07862	2.32e-07	6.98e-07
AC013457.1	3.50561	0.111922	2.36e-07	7.1e-07
TRABD2B	-1.03797	4.32721	2.4e-07	7.22e-07
TUBB8P1	1.71041	0.856365	2.43e-07	7.3e-07
NPM1P26	1.82146	2.22047	2.45e-07	7.34e-07
SNORA7B	4.12905	2.01633	2.55e-07	7.61e-07
AC073210.1	1.4744	0.373248	2.56e-07	7.63e-07
SERPINA10	2.47863	4.46606	2.64e-07	7.84e-07
UBE2R2-AS1	1.47224	1.92392	2.93e-07	8.69e-07
AC092681.2	2.16767	1.67404	2.94e-07	8.72e-07
PKD1L3	1.72118	2.30898	2.98e-07	8.83e-07
AC078883.2	2.77111	0.956679	3.12e-07	9.21e-07
MTND5P1	-1.24034	0.733823	3.14e-07	9.27e-07
AL034417.1	1.43808	0.214873	3.19e-07	9.4e-07
AC136475.10	1.2315	2.3859	3.2e-07	9.42e-07
SNORD70	2.97204	0.0209206	3.25e-07	9.56e-07
HIST1H3A	3.28705	2.78025	3.31e-07	9.72e-07
AC064872.1	6.19419	1.49613	3.6e-07	1.06e-06
AL359918.1	1.71207	2.31137	3.79e-07	1.11e-06
TYR	3.95333	0.66659	3.88e-07	1.14e-06
MPRIP-AS1	3.16123	0.872038	3.92e-07	1.15e-06
AC084859.1	1.56729	1.60087	4.29e-07	1.25e-06
EN1	3.17654	1.204	4.38e-07	1.27e-06
CALHM3	2.41248	1.28822	4.58e-07	1.33e-06
JSRP1	1.49553	5.80427	4.73e-07	1.37e-06
RNVU1-18	5.65802	1.01865	4.94e-07	1.43e-06
RPL3P2	1.32237	4.64654	5.05e-07	1.45e-06
AC005262.1	1.66308	0.359059	5.06e-07	1.45e-06
AP000943.4	1.97464	0.552476	5.16e-07	1.48e-06
DDX18P5	2.92695	0.832917	5.22e-07	1.5e-06
TNIP3	-1.06773	3.94123	5.26e-07	1.51e-06
AC112484.3	1.70731	1.98139	5.55e-07	1.59e-06
AL136115.1	2.58842	1.18784	5.72e-07	1.64e-06
RN7SKP203	6.4849	2.17148	5.76e-07	1.64e-06
RPL21P65	1.87161	0.51239	5.76e-07	1.64e-06
SETP5	2.68908	0.716556	6.02e-07	1.71e-06
AL445673.1	-1.05475	-0.14775	6.03e-07	1.71e-06
SNORD105B	3.67937	-0.189766	6.05e-07	1.72e-06
RNU1-28P	5.8701	1.20794	6.65e-07	1.89e-06
ANKRD10-IT1	1.10139	6.22501	7.28e-07	2.06e-06
RF00003	5.50878	1.21058	7.37e-07	2.08e-06
AL807761.3	3.19866	0.390708	7.74e-07	2.18e-06
PLA2G16	1.01541	8.57212	7.91e-07	2.22e-06
RNA5SP225	6.50117	1.61603	8.22e-07	2.31e-06
RAMACL	2.14421	1.18269	9.11e-07	2.54e-06
CT62	-1.01878	0.900617	9.13e-07	2.55e-06
IRX2	2.56913	5.88196	9.17e-07	2.56e-06
SLURP1	3.0072	-0.135512	9.3e-07	2.59e-06
H2AFVP1	1.1069	2.19925	9.37e-07	2.6e-06
AL589182.2	2.4847	0.0562265	9.61e-07	2.67e-06
IGFN1	2.03078	4.06361	9.78e-07	2.71e-06
SNORD117	1.89007	0.499803	1e-06	2.78e-06
IGHV3-64	-1.61896	4.97484	1.01e-06	2.79e-06
AC066616.2	5.19547	0.999127	1.02e-06	2.81e-06
TXNP5	1.5858	1.83153	1.09e-06	3e-06
MTND5P32	5.48097	1.34481	1.09e-06	3e-06
PAX3	3.91352	1.36347	1.09e-06	3.01e-06
AL359880.1	2.69153	0.504843	1.13e-06	3.1e-06
PTPRO	1.47629	9.24352	1.13e-06	3.11e-06
PRKCA-AS1	3.82927	1.70559	1.14e-06	3.12e-06
RNU2-23P	5.33667	0.821934	1.17e-06	3.21e-06
AC114402.2	3.39961	1.25275	1.18e-06	3.23e-06
AC015983.1	2.10794	0.0105173	1.24e-06	3.36e-06
AC034213.1	2.02863	0.265888	1.26e-06	3.43e-06
KRT18P55	1.13135	1.0665	1.26e-06	3.44e-06
STX8P1	2.45759	-0.0478995	1.29e-06	3.5e-06
AJ239328.1	1.6484	1.63587	1.3e-06	3.52e-06
SLC22A12	2.72973	-0.158985	1.3e-06	3.54e-06
AC027279.1	2.00171	2.20763	1.38e-06	3.73e-06
BCAS4	1.07402	6.86893	1.39e-06	3.77e-06
AC011676.5	1.74847	1.14126	1.41e-06	3.81e-06
AL513485.1	-1.07416	0.74206	1.45e-06	3.91e-06
CATIP-AS1	1.08595	0.93571	1.46e-06	3.93e-06
CALCB	4.42108	5.96712	1.47e-06	3.97e-06
AC007899.1	2.46928	0.319161	1.5e-06	4.04e-06
RPL8P2	1.512	0.628608	1.53e-06	4.11e-06
MXRA5	1.1644	9.94566	1.57e-06	4.21e-06
RPL12P11	2.55803	0.485729	1.61e-06	4.33e-06
AC011290.1	1.38928	0.0339816	1.66e-06	4.45e-06
ADRB1	-1.10844	3.69522	1.77e-06	4.71e-06
AL359878.2	1.61734	-0.112025	1.78e-06	4.73e-06
AC006460.1	2.50673	0.975501	1.79e-06	4.76e-06
AL359851.1	3.93978	0.462207	1.79e-06	4.77e-06
AC021237.1	4.20945	0.560786	1.84e-06	4.89e-06
AL645608.7	1.11758	3.2267	1.88e-06	4.98e-06
AC018992.1	1.77053	0.512781	1.91e-06	5.06e-06
AC064805.1	1.82558	2.04845	1.94e-06	5.13e-06
AL356320.2	4.12792	0.944787	1.98e-06	5.21e-06
GOLGA8K	-1.17485	-0.359741	2e-06	5.27e-06
AC007342.9	1.15301	4.25004	2.02e-06	5.31e-06
AC007496.3	3.92341	2.00789	2.03e-06	5.33e-06
AC006017.1	1.38557	1.07043	2.05e-06	5.38e-06
AL590428.1	-1.22698	0.317461	2.06e-06	5.4e-06
SKAP1-AS1	1.90525	0.250233	2.06e-06	5.4e-06
NPR3	-1.25483	5.04812	2.08e-06	5.46e-06
AP001207.1	3.51506	0.246434	2.13e-06	5.57e-06
AC025181.1	1.70316	0.321179	2.28e-06	5.95e-06
AC009319.1	1.72766	-0.134586	2.3e-06	6e-06
ATOH1	-1.3082	7.8428	2.3e-06	6.01e-06
KLF7-IT1	2.11616	1.30228	2.32e-06	6.06e-06
TLX1NB	1.66268	0.580592	2.38e-06	6.2e-06
RPL12P19	1.19674	0.949723	2.39e-06	6.21e-06
KCNRG	1.10922	2.59575	2.41e-06	6.26e-06
AL358232.1	2.75276	1.17338	2.43e-06	6.29e-06
ZNF75BP	5.03676	0.799712	2.45e-06	6.34e-06
MIR6812	1.57061	-0.0166862	2.48e-06	6.42e-06
AC104109.4	1.12371	1.31336	2.56e-06	6.63e-06
VEPH1	-1.00909	3.27122	2.62e-06	6.78e-06
AC092118.2	1.24144	0.421908	2.63e-06	6.79e-06
AC093673.2	2.0929	0.845106	2.63e-06	6.79e-06
SLC25A15P3	-1.74444	-0.27091	2.65e-06	6.84e-06
VPREB3	-1.38373	3.90772	2.82e-06	7.26e-06
MAGEC2	4.72026	0.87966	2.87e-06	7.38e-06
AC009951.1	4.0871	2.5227	2.89e-06	7.41e-06
AC008277.1	3.91272	1.49836	2.9e-06	7.44e-06
HYDIN2	-1.28461	0.909399	2.93e-06	7.52e-06
MTCYBP32	5.00069	0.880696	3.05e-06	7.8e-06
AL513175.1	1.17112	0.560508	3.09e-06	7.9e-06
NCOA7-AS1	3.65162	0.0455564	3.18e-06	8.13e-06
RPL10P9	1.7568	7.39167	3.26e-06	8.33e-06
KCTD16	1.95893	3.1445	3.46e-06	8.82e-06
RN7SL38P	4.35546	0.347868	3.6e-06	9.15e-06
RETN	1.8651	1.54756	3.63e-06	9.21e-06
EPN2-AS1	2.32231	0.813042	3.64e-06	9.25e-06
CIAPIN1P	1.48981	0.740064	3.71e-06	9.42e-06
AC072062.1	2.58728	-0.267535	3.72e-06	9.42e-06
PCP4	-1.58885	5.34636	3.73e-06	9.45e-06
CELF2-AS2	4.80389	0.875839	3.97e-06	1e-05
PHBP11	1.65199	0.345219	4.05e-06	1.02e-05
RNA5SP259	4.35331	0.0667061	4.38e-06	1.1e-05
RN7SKP180	3.68091	0.903149	4.47e-06	1.12e-05
ABHD17AP3	1.49825	0.294189	4.69e-06	1.17e-05
AC007849.1	3.6454	1.49023	4.7e-06	1.18e-05
AC120349.3	3.45392	0.677169	4.89e-06	1.22e-05
AL627389.1	1.12972	1.08562	4.9e-06	1.23e-05
RN7SL118P	2.82731	0.794636	4.95e-06	1.24e-05
AL157402.2	4.69068	0.749122	4.96e-06	1.24e-05
OPRD1	1.90731	3.87221	5.15e-06	1.28e-05
AC002558.2	3.03752	0.188899	5.17e-06	1.29e-05
AC110813.1	-1.94711	2.17062	5.18e-06	1.29e-05
RPL12P29	2.29715	0.173643	5.22e-06	1.3e-05
SFTA3	4.69361	1.26454	5.23e-06	1.3e-05
UBE2NL	1.58289	0.207248	5.37e-06	1.33e-05
SUMO2P8	3.84816	0.664043	5.38e-06	1.33e-05
CSMD1	-1.34401	1.3488	5.5e-06	1.36e-05
AC009303.2	3.07021	1.71292	5.62e-06	1.39e-05
RPL15P20	1.38975	1.19994	5.82e-06	1.44e-05
CACYBPP1	3.50774	0.488792	6.1e-06	1.5e-05
CDK7P1	1.5547	-0.0734677	6.26e-06	1.54e-05
AC022540.1	2.8876	0.574115	6.32e-06	1.55e-05
FFAR4	-1.07035	7.70486	6.42e-06	1.58e-05
AC008758.2	1.31269	0.600599	6.44e-06	1.58e-05
AL139174.1	1.89566	1.02445	6.45e-06	1.58e-05
AC010320.3	1.47588	0.677439	6.49e-06	1.59e-05
RN7SL825P	2.7988	0.0420242	6.63e-06	1.62e-05
GAPDHP39	2.56611	0.526862	6.79e-06	1.66e-05
AC016866.2	3.53239	-0.112769	6.92e-06	1.69e-05
AC063947.2	1.65372	0.391033	6.94e-06	1.69e-05
AL139274.1	5.16498	1.8242	6.94e-06	1.69e-05
AC003989.1	4.06849	0.749665	7e-06	1.7e-05
AL353807.2	1.29484	-0.0389641	7.05e-06	1.71e-05
TDGF1P5	2.25696	0.403213	7.08e-06	1.72e-05
AC008781.1	1.72599	1.07839	7.31e-06	1.78e-05
FAM166A	1.18443	0.431496	7.39e-06	1.79e-05
DNM1P51	-1.06512	0.889248	7.91e-06	1.92e-05
AC104129.1	2.67396	0.443764	8.65e-06	2.08e-05
TIMM9P1	3.56813	-0.0865095	9.02e-06	2.17e-05
RN7SKP48	4.24995	0.148387	9.15e-06	2.2e-05
AL442224.1	3.17254	0.0198827	9.62e-06	2.3e-05
CLDN20	1.54529	2.17798	1e-05	2.39e-05
AC020899.1	1.18279	2.58868	1.02e-05	2.44e-05
AC009088.2	1.82188	0.143586	1.07e-05	2.55e-05
CCNJP2	3.99841	0.34816	1.1e-05	2.61e-05
AL512444.1	2.79776	0.391413	1.16e-05	2.76e-05
AL139351.1	1.57062	-0.264797	1.17e-05	2.77e-05
AL512430.3	1.591	0.10864	1.18e-05	2.79e-05
RNU2-64P	3.60203	-0.194657	1.25e-05	2.94e-05
HIGD1AP16	2.5538	0.286257	1.33e-05	3.14e-05
AC004491.1	3.79023	0.321517	1.33e-05	3.14e-05
AP005432.1	2.33447	1.41762	1.36e-05	3.19e-05
AC073551.1	3.53641	0.132628	1.43e-05	3.35e-05
RPL34P6	1.29449	0.408819	1.44e-05	3.37e-05
RNU1-19P	4.54905	0.598193	1.45e-05	3.39e-05
AC024451.4	1.59567	0.841332	1.51e-05	3.52e-05
PSG6	3.67738	-0.0706647	1.57e-05	3.67e-05
IGLJ3	2.95856	3.20956	1.59e-05	3.69e-05
LINC00954	1.26631	3.42507	1.59e-05	3.71e-05
AC002563.1	1.58897	0.0476649	1.6e-05	3.71e-05
BTF3P6	1.66305	-0.0225729	1.62e-05	3.76e-05
EI24P2	1.91376	1.18924	1.66e-05	3.84e-05
EIF1AXP2	3.58857	-0.181185	1.77e-05	4.09e-05
ZNF346-IT1	1.09504	1.48806	1.85e-05	4.27e-05
CCDC175	1.29379	2.21451	1.87e-05	4.31e-05
RN7SKP74	2.65588	0.661382	1.88e-05	4.34e-05
DPRXP1	3.69466	0.213908	1.91e-05	4.39e-05
AL590762.2	1.29078	0.170249	1.91e-05	4.39e-05
AL139184.1	3.51117	-0.210526	2.03e-05	4.65e-05
RPS2P1	1.29606	0.0695844	2.05e-05	4.7e-05
LINC01494	2.04048	-0.330154	2.07e-05	4.74e-05
STPG3-AS1	1.11217	2.1841	2.09e-05	4.78e-05
OR7E121P	2.40108	-0.280561	2.1e-05	4.8e-05
AC092666.1	2.94563	0.93845	2.11e-05	4.82e-05
RBM44	1.13932	2.45432	2.26e-05	5.15e-05
AL162457.2	1.84833	0.0320268	2.39e-05	5.45e-05
AC027627.1	2.22076	-0.0498042	2.63e-05	5.95e-05
AC108159.1	2.70564	0.0303836	2.65e-05	5.99e-05
AL591846.2	1.24162	0.0820143	2.66e-05	6e-05
RN7SL57P	3.42395	0.326981	2.68e-05	6.05e-05
AC103792.1	2.7828	-0.169378	2.7e-05	6.08e-05
RNU6-130P	2.66189	0.307936	2.75e-05	6.19e-05
SNORA2A	1.45722	1.16466	2.75e-05	6.19e-05
RNA5SP354	4.08453	0.455971	2.78e-05	6.24e-05
RN7SKP133	3.8027	-0.0757616	2.9e-05	6.49e-05
PDHA1P1	3.6029	0.593112	2.93e-05	6.55e-05
MIR6859-1	1.29406	0.225501	2.94e-05	6.56e-05
AC135586.1	1.71602	-0.182944	3.04e-05	6.78e-05
RAD17P1	-1.0443	1.35541	3.07e-05	6.84e-05
C10orf91	1.07971	3.20878	3.09e-05	6.88e-05
AC018463.1	2.60747	1.07247	3.09e-05	6.88e-05
FAR1-IT1	2.50878	0.518422	3.09e-05	6.88e-05
SLC6A4	-1.2245	5.56099	3.25e-05	7.2e-05
ACTG1P16	1.67115	0.214904	3.26e-05	7.22e-05
AC105450.1	2.08774	-0.0329793	3.27e-05	7.25e-05
AC016746.1	2.39411	1.8205	3.34e-05	7.4e-05
IQUB	1.02392	1.42625	3.39e-05	7.49e-05
CDH16	2.1693	4.65579	3.4e-05	7.52e-05
AL133297.1	1.0067	0.360234	3.43e-05	7.57e-05
C9orf41-AS1	1.46774	1.29461	3.45e-05	7.6e-05
KIR3DL2	-1.31345	0.244499	3.48e-05	7.66e-05
MTND3P12	3.83122	-0.0521443	3.6e-05	7.93e-05
ZSCAN10	1.75809	-0.139342	3.61e-05	7.95e-05
AC110772.1	2.71057	0.942125	3.62e-05	7.97e-05
AL356805.1	3.28133	0.162356	3.85e-05	8.42e-05
RN7SL128P	2.16105	2.35581	3.93e-05	8.58e-05
FTH1P24	3.07343	0.170731	4.2e-05	9.17e-05
AC011481.3	1.04584	0.755627	4.32e-05	9.4e-05
ZNF663P	2.1538	2.80733	4.32e-05	9.4e-05
RGS21	2.74704	-0.182151	4.58e-05	9.94e-05
TSPOAP1	1.17409	7.68171	4.6e-05	9.96e-05
RNU1-46P	3.88427	-0.0753496	4.65e-05	0.00010077
LINC01250	2.06034	-0.175589	4.7e-05	0.000101736
LINC00323	1.1294	1.5507	4.72e-05	0.000102169
AP006296.1	1.26431	1.4014	4.73e-05	0.000102214
AL136018.1	1.86213	-0.00252212	4.87e-05	0.000105094
C1QL4	1.70426	0.651502	4.95e-05	0.000106758
MIR3942	1.32099	-0.0539778	4.96e-05	0.00010694
AC233280.2	1.05386	2.04658	5e-05	0.000107532
AL158212.4	2.27086	0.394666	5e-05	0.000107578
AC007787.2	1.19775	0.707109	5.01e-05	0.000107725
RNU6-606P	3.47038	-0.00405075	5.12e-05	0.000109911
ATP1B1P1	1.29419	0.561179	5.15e-05	0.000110451
AL121845.4	1.18814	0.75018	5.18e-05	0.000111153
AC104232.2	3.29336	-0.226652	5.19e-05	0.000111153
TDRD5	1.14511	4.60448	5.29e-05	0.000113285
ETF1P1	1.76879	0.307789	5.48e-05	0.000117174
SNORD8	2.86073	0.113119	5.58e-05	0.000119283
AC092364.2	1.44787	1.65805	5.61e-05	0.000119863
PLA2G4D	1.14513	3.24491	5.66e-05	0.000120757
SMOC1	1.69664	6.77754	5.83e-05	0.000124107
RSU1P2	2.12939	0.535853	5.85e-05	0.000124307
ANKLE1	1.09249	3.16107	5.85e-05	0.00012442
AC108474.1	2.5747	2.1566	6.04e-05	0.000128117
PLET1	2.59415	-0.112668	6.15e-05	0.000130129
RNU1-3	3.58771	-0.202061	6.19e-05	0.000130845
LINC01152	1.34651	1.97922	6.2e-05	0.000130998
AL121987.1	-1.27526	0.19642	6.25e-05	0.000131813
AC068870.3	2.53394	0.136813	6.34e-05	0.000133586
AC133961.1	2.36013	1.2117	6.51e-05	0.000137086
IL36B	2.73867	0.987299	7.05e-05	0.000147673
AL133492.1	2.84226	0.155991	7.25e-05	0.00015168
AC131953.1	1.28362	0.386991	7.27e-05	0.000151983
RPL17P17	3.73473	0.40621	7.32e-05	0.000152828
LCE3D	3.42135	-0.218053	7.32e-05	0.000152828
AC079316.1	2.57593	0.164295	7.46e-05	0.000155477
USH1G	-1.30708	0.904811	7.55e-05	0.00015737
RF00598	2.98432	-0.250153	7.57e-05	0.000157584
PPIAP87	1.13031	0.21493	7.59e-05	0.000157861
UBE2CP1	2.41676	0.44175	7.74e-05	0.000160817
AL390778.2	2.43369	0.942916	7.78e-05	0.000161597
NDUFA8P1	3.50113	-0.116679	7.89e-05	0.000163685
SOD1P3	1.34339	0.00232934	7.93e-05	0.000164338
BECN2	1.51477	-0.127968	8.09e-05	0.000167379
AF178030.1	3.62634	0.0505417	8.11e-05	0.000167815
AC025198.1	1.06629	-0.013283	8.22e-05	0.000169953
AP001636.1	1.50647	0.0664234	8.32e-05	0.000171855
AC092683.1	1.08404	1.57097	8.36e-05	0.000172594
HMGB3P9	2.87468	0.33467	8.41e-05	0.000173326
FLG2	3.08834	0.19767	8.41e-05	0.000173326
LATS2-AS1	3.49662	0.0442096	8.43e-05	0.000173636
TGIF2-RAB5IF	1.05384	0.296839	8.56e-05	0.000175884
MZT1P1	3.09929	0.0638753	8.71e-05	0.000178821
RC3H1-IT1	3.04551	0.480762	9.03e-05	0.000184995
GPR52	2.93092	0.809701	9.14e-05	0.000187115
AC105137.1	2.53263	0.345874	9.23e-05	0.000188687
SNORD121A	1.82163	-0.299985	9.34e-05	0.00019088
AC020763.3	1.26183	1.73867	9.56e-05	0.00019511
AC138393.3	1.30914	1.25155	9.65e-05	0.00019681
AC026725.1	2.63392	0.104335	9.85e-05	0.000200473
AP000462.2	3.31612	-0.281182	0.000104045	0.000211444
RNVU1-3	1.18708	0.472921	0.000109022	0.000221156
LINC01561	1.3832	1.55073	0.000109398	0.000221782
AL365357.1	2.2423	7.47763	0.000110666	0.000224082
AL450226.2	2.74662	-0.156768	0.000112734	0.000227856
RPL9P32	1.25196	2.04013	0.00011525	0.000232378
RN7SL430P	3.1751	0.0648088	0.000115565	0.000232732
AC097532.2	1.15924	0.202059	0.000119751	0.000241017
CRNN	3.13426	-0.332098	0.000122306	0.000246011
LINC02365	1.85688	0.238664	0.000122656	0.000246566
CICP22	1.18233	0.068315	0.000126031	0.000252895
AL360091.2	3.17797	0.211919	0.000127731	0.000255998
RNA5SP383	1.29003	1.13979	0.000130592	0.000261575
AL031772.1	1.64629	2.1137	0.000134231	0.000268543
AC055733.1	3.3394	0.351489	0.000134904	0.000269728
AC103853.1	3.1175	-0.270969	0.00013786	0.000275308
TAS2R2P	1.72772	-0.286227	0.000138997	0.000277414
RN7SL783P	3.3222	-0.236441	0.000142277	0.00028379
CD19	-1.08232	4.97263	0.00014495	0.000288777
AC009318.4	1.25068	1.22159	0.000158588	0.000315382
AC091059.2	2.85791	0.307736	0.000161256	0.000320307
AC073288.2	1.05465	0.238543	0.000162273	0.000322136
RNU4ATAC11P	3.1444	-0.135873	0.000163068	0.000323522
IGLV3-24	-1.40428	-0.0984275	0.000163397	0.000323981
IGHD2-2	-1.33248	-0.235936	0.000163917	0.00032482
RN7SL359P	3.12254	0.270589	0.000165386	0.000327536
RNU6-171P	2.91879	-0.284774	0.000172017	0.000339262
DIP2A-IT1	2.03408	0.514879	0.0001742	0.000343363
TOMM20P1	1.24941	-0.0841255	0.000177717	0.000350091
HMGN1P2	2.84391	0.22645	0.000178353	0.000351136
AC083843.1	1.45063	-0.323006	0.000179095	0.000352389
AC104390.1	1.30026	0.153335	0.000183437	0.000360508
NDUFB5P2	3.24716	0.179516	0.000187389	0.000368059
AC021171.1	2.29632	-0.116517	0.00019869	0.000388883
XIAPP2	2.67011	0.505743	0.000199866	0.000390727
AC100793.1	2.43909	-0.303114	0.000200397	0.000391306
ANKRD26P1	2.11402	-0.241475	0.000201287	0.000392808
AL139128.1	1.32771	0.806434	0.000201401	0.000392808
RNU6-998P	2.90463	-0.104791	0.000205986	0.000400581
AL353689.1	1.86357	-0.110745	0.000210248	0.000408376
SPRR2B	4.00056	0.421637	0.000216201	0.000418499
RNA5SP452	3.13094	0.272403	0.000217205	0.000419995
DRAIC	-1.0018	4.37801	0.000218852	0.000422651
TMEM215	1.50199	0.227387	0.000220037	0.000424693
AC026523.1	2.11565	0.25198	0.000223694	0.000431503
AL355877.2	1.33128	-0.0314732	0.000229037	0.000441554
AL358333.2	3.20938	-0.0587955	0.00023579	0.000454311
TNRC18P2	1.17599	0.157222	0.000236717	0.000455833
RPSAP21	1.26171	0.0459131	0.000237275	0.000456644
RN7SL372P	3.74601	0.0645583	0.000239975	0.000461576
AC009563.1	1.77042	-0.00437558	0.000241253	0.000463767
AC090673.2	2.06839	-0.0523973	0.00024214	0.000465204
RNU6-834P	1.4167	-0.165109	0.000245833	0.000472027
AC106801.1	2.13987	0.847025	0.000249995	0.000479468
AC087749.2	2.36068	0.158618	0.000260846	0.000499396
AC074051.4	1.34108	-0.17443	0.000260984	0.000499396
AP002336.1	1.88474	-0.00948451	0.00026431	0.000505182
AC021739.1	1.7414	-0.240071	0.000274319	0.000523116
2022-12-01	1.16036	2.39719	0.000276413	0.000526808
AC020913.2	1.18395	-0.218303	0.000278746	0.000530951
KRT18P36	1.19225	-0.0708746	0.000282314	0.000536525
AC098476.1	1.31008	2.70924	0.000296759	0.000563017
RPS7P8	1.10153	0.134687	0.000306652	0.000580468
SCUBE3	1.07707	5.62427	0.000307003	0.000580802
LINC01502	-1.43037	0.547686	0.000308633	0.000583225
CASP1P2	1.33828	1.45721	0.000316812	0.000597667
AC009318.1	1.01008	3.07712	0.000325573	0.000612441
RNF219-AS1	1.05706	0.584603	0.000325743	0.000612441
AC090092.1	1.31173	-0.129438	0.000335588	0.000630241
AC106865.1	1.44627	1.37302	0.000339499	0.000637228
C2orf91	1.96413	0.960748	0.000359929	0.000672551
TUBB4BP2	2.042	-0.250755	0.000362353	0.000676702
AC068790.6	1.45946	0.305227	0.000364751	0.0006808
OR2T10	2.82749	-0.127811	0.00037454	0.000697124
DRC1	1.13284	0.847654	0.00037882	0.000704699
AL139352.1	1.20131	2.0331	0.00037919	0.000704993
RN7SL698P	2.30787	-0.219585	0.000381246	0.000707635
RN7SL144P	2.59097	0.0623246	0.000403491	0.000746849
NLRP11	1.55771	3.14387	0.000405497	0.000749732
FBXO40	3.26105	2.04439	0.000416291	0.000768413
AL360091.1	1.2104	0.535089	0.000426407	0.000786217
PAGE2	2.28521	-0.335427	0.000427204	0.000787252
RN7SL314P	3.06466	-0.269505	0.000439153	0.000808826
IGLV2-5	-1.19711	1.8868	0.000456046	0.00083717
FLJ30679	1.23807	-0.0651655	0.000463157	0.000849291
AL512593.1	2.43757	-0.238008	0.000464057	0.000850474
RNU6-190P	1.47429	-0.128511	0.000475895	0.00087026
ACTBP13	1.14228	1.12693	0.000477349	0.000871964
HNRNPA1P71	1.62104	0.24348	0.000489425	0.000893046
AC018797.1	1.60241	-0.214853	0.000500908	0.0009135
ACMSD	1.46195	1.04578	0.000506242	0.000922725
RNU6-608P	2.7767	-0.235466	0.00052506	0.000954941
AC124283.4	1.05546	0.805736	0.000537419	0.000975825
AC068397.1	2.30109	0.0836687	0.000541843	0.000983323
RNU6-766P	2.65192	-0.29879	0.000543333	0.000985492
AF131215.1	2.78315	0.360243	0.000554826	0.00100525
AL022238.2	1.78478	0.489591	0.000570742	0.0010324
LINC02241	2.88534	-0.223622	0.000577808	0.00104349
AC131212.1	1.00296	0.419592	0.000580591	0.00104682
SETP21	1.09065	-0.210634	0.000586197	0.00105579
RN7SL806P	1.58858	-0.140225	0.000589293	0.00106022
KLF4P1	2.47147	-0.310645	0.000612337	0.0010999
AC092839.2	1.83047	0.032804	0.000623832	0.00111995
RN7SKP16	1.06605	1.26658	0.00064266	0.00115189
AC060773.1	2.07594	-0.111887	0.000655522	0.00117431
AC022858.1	1.92505	-0.301264	0.000656185	0.00117487
AL162171.2	1.76277	0.640946	0.000664217	0.00118735
AC087269.1	1.34715	0.983322	0.000672089	0.00119949
AL132765.1	1.60273	0.490611	0.000687936	0.00122516
SLC30A2	1.37961	5.16607	0.00069677	0.00123957
LINC00452	1.91736	-0.200522	0.000704101	0.00125061
LINC00670	-1.08523	-0.302844	0.000712828	0.00126544
GSG1L	-1.31569	1.30139	0.000728064	0.00129112
AC016292.1	2.39684	0.409913	0.00072866	0.00129149
LINC01551	2.26799	-0.261266	0.000729862	0.00129293
LINC02470	2.41951	0.00042505	0.000738555	0.00130694
AL359697.1	1.10644	0.828887	0.000741502	0.00131146
AC007496.2	2.17774	-0.0918539	0.00075469	0.00133127
RN7SKP243	1.98616	-0.177837	0.000762198	0.00134238
AC109361.1	1.12153	0.22506	0.000770314	0.00135596
RN7SL370P	2.61676	-0.279273	0.000776091	0.00136541
SNORD91B	1.42292	-0.0737869	0.000782962	0.00137678
AC006254.2	1.51502	-0.137711	0.000807203	0.00141568
AC005920.4	1.21426	-0.0173626	0.000829709	0.00145362
PDCL3P3	1.7643	0.0315032	0.000833372	0.00145927
NEUROD4	2.92701	-0.203698	0.000871641	0.00152309
AC022778.1	2.97008	0.294175	0.000879691	0.00153555
LGALS17A	1.34757	2.7668	0.00093536	0.00162847
ROS1	-1.05788	2.95704	0.000943455	0.00164086
LYPLAL1-AS1	1.73739	-0.178642	0.000958585	0.00166544
NFE4	1.68667	0.475012	0.000960464	0.00166697
OR13Z2P	1.11108	0.137844	0.00102255	0.00176463
AC006026.1	1.28186	-0.137416	0.00103161	0.00177844
AC025031.1	1.32884	0.330696	0.00104273	0.00179669
AC097382.1	1.34681	0.312541	0.00107277	0.00184179
AL355297.2	2.30387	-0.310755	0.00109354	0.00187455
AC005730.3	1.2316	0.388924	0.00110339	0.00189048
AL159972.1	2.01626	-0.0426355	0.00110454	0.001891
MIR374B	1.54745	0.136488	0.0011515	0.00196886
LINC02078	-1.13013	0.267831	0.00116365	0.00198861
AC009365.2	2.55499	0.677497	0.00134719	0.00228707
LINC02159	1.12184	1.94728	0.00135062	0.00229174
NHLH2	2.17174	1.5942	0.0013604	0.00230599
RTEL1P1	1.03407	0.713934	0.00136321	0.00230957
LINC00244	1.0269	0.873673	0.00136996	0.00231866
RN7SL200P	2.08028	0.0946505	0.00137369	0.0023238
FPR2	1.14841	4.5143	0.00146796	0.0024745
ONECUT1	1.45218	-0.0681999	0.0015041	0.00253286
AC096631.2	1.09653	-0.0552205	0.00152762	0.00256869
AC005912.2	1.81848	0.0505253	0.00154141	0.00259047
MIR4326	1.01793	0.093855	0.00165402	0.00276857
CDK8P2	1.14798	-0.212784	0.00166204	0.0027806
VTI1BP2	1.02292	-0.217434	0.00170111	0.00283886
EDDM13	1.01086	2.28412	0.0017843	0.00296584
RNU6-1005P	1.79221	-0.21421	0.00181685	0.00301394
MYO3A	-1.01587	2.09819	0.00185743	0.00307821
RNU6-45P	1.06166	-0.270034	0.00202353	0.00333364
CLEC3A	1.99506	0.678718	0.0020554	0.0033828
KLK2	1.17042	0.882766	0.00205679	0.00338343
AC067904.2	1.19481	0.156162	0.00206319	0.00339228
AC079866.1	2.08233	0.662392	0.0022259	0.00364188
RNU6-315P	1.71852	-0.20642	0.00240208	0.00390909
AHCYP2	1.0419	0.452135	0.0024265	0.00394114
ADORA2BP1	1.21899	-0.281985	0.00263165	0.00425985
AC021171.2	2.25682	-0.0878476	0.00272217	0.00439573
RPSAP16	1.20024	0.0620405	0.00273472	0.00441387
RNA5SP260	1.68937	-0.257697	0.00293531	0.00470805
RN7SKP230	1.79277	0.0909827	0.00297944	0.00476511
GAPDHP42	1.50641	0.689086	0.00307811	0.00490881
RN7SL328P	1.85387	0.305283	0.00320709	0.00510233
AC136424.1	2.50563	-0.228696	0.00324617	0.00515959
AC007598.3	1.60705	-0.00480152	0.00330033	0.0052382
AC122718.2	1.80138	1.1071	0.00339123	0.00537736
CAV3	-1.03949	0.0941111	0.00340828	0.00540183
UTS2	1.0513	3.21543	0.00344225	0.00544793
COL20A1	1.30596	0.549116	0.00350163	0.00553214
RN7SL508P	2.14208	0.0817595	0.00351278	0.00554379
AL161733.1	1.16793	0.147695	0.00357089	0.00562486
HLA-DPA3	1.15692	0.352527	0.0035864	0.00564663
AL031666.1	1.3526	2.08127	0.00360788	0.00567243
AC011284.1	2.13986	-0.201553	0.00375075	0.00588875
AC010886.1	2.11058	-0.198555	0.00381604	0.00597441
AC022905.1	1.59775	0.225206	0.00422627	0.00656132
LINC01933	1.01966	0.180491	0.0042488	0.00659017
AC022613.3	1.32201	1.3448	0.00431872	0.00669241
AC090617.7	1.96042	-0.117651	0.00433532	0.00670881
IGLJ7	2.21693	0.161495	0.00461433	0.0071142
AC139769.2	1.35622	1.23391	0.0046724	0.00720041
MIR3681HG	1.66422	1.32828	0.00468181	0.00721159
AC005160.1	2.44616	-0.297703	0.00493947	0.00759334
AC067817.1	2.14277	-0.098424	0.0051861	0.00794805
TRPV5	1.16024	-0.138227	0.00527366	0.00806745
AL161672.1	1.44849	0.146883	0.00581909	0.00886125
CES5AP1	1.42826	0.726472	0.00609457	0.00925123
AC008443.3	1.6633	-0.0351692	0.00615181	0.00932965
AL035446.1	1.1098	2.45981	0.00635298	0.00960856
RHEBP3	1.8137	-0.130802	0.00649326	0.00980741
AF279873.3	1.67323	-0.149664	0.00670169	0.0100857
HMGN1P24	1.11934	-0.348819	0.00715936	0.0107214
RN7SL126P	2.42885	-0.0651009	0.00718099	0.010749
NLRP4	2.2719	3.06029	0.00739358	0.0110326
CRYBA1	1.03685	0.0473274	0.00787881	0.0116992
CCNL2P1	1.58764	0.15213	0.00798063	0.0118398
GPR151	1.59419	-0.269284	0.00818537	0.012122
CAPSL	1.3021	-0.286204	0.00827262	0.0122458
AC008011.2	1.37505	-0.278572	0.00841392	0.0124165
HRH3	1.85642	0.786537	0.0085392	0.0125847
AC123595.1	1.00568	0.48097	0.00889382	0.0130612
LINC00871	1.51216	0.381066	0.0093734	0.0137293
HNRNPA3P2	1.12663	-0.130731	0.0104733	0.0152203
CARM1P1	1.51322	-0.223897	0.0107226	0.0155554
LINC00607	1.06222	2.32737	0.0109173	0.0158241
TMPRSS11CP	1.18126	0.202804	0.0117003	0.0169004
LRRTM3	-1.00227	-0.23131	0.0118419	0.0170828
ANKRD34B	1.44531	0.608617	0.011975	0.0172674
AC073912.2	1.17619	0.144883	0.0119985	0.0172863
AC020913.3	1.1532	0.178263	0.0120161	0.0173042
AL390036.1	1.06888	-0.195308	0.012139	0.0174737
ERICH3-AS1	1.69777	-0.0577817	0.0124599	0.0179124
AL356124.2	1.11824	-0.0112992	0.0133783	0.0191668
NPHP3-ACAD11	1.0071	-0.330662	0.0139742	0.0199691
LYPD2	1.63831	0.252815	0.0151484	0.0215091
AC008417.1	1.04066	0.0534418	0.0151928	0.021563
ALB	1.71531	3.99717	0.015704	0.0222506
AC008868.1	1.11696	-0.149201	0.0165003	0.0232901
NEUROD2	1.10392	0.994178	0.0165357	0.0233301
NBPF6	1.06576	1.25878	0.016556	0.0233489
PON1	1.14405	2.31931	0.0168726	0.0237353
SLC39A2	1.17486	5.66148	0.016897	0.0237596
AC124312.4	1.57771	0.545631	0.0176611	0.0247715
RBP3	1.22152	1.35868	0.0182822	0.0255355
RF00191	1.65492	-0.286134	0.0198023	0.0274634
AC237221.2	1.5787	-0.23814	0.0201495	0.0278987
FNDC1-IT1	1.08234	-0.239118	0.0222047	0.0305041
ANKRD30BP1	1.52357	0.107515	0.0240255	0.0327629
AC025040.1	1.32772	-0.0461296	0.0274236	0.0371542
Z98048.1	1.01632	-0.066748	0.0284998	0.0385342
AP005328.1	1.28545	-0.310038	0.0307525	0.0412627
HPN-AS1	1.02448	0.0808702	0.0310837	0.0416736
AL162431.4	1.06324	-0.113383	0.0362451	0.0481108
